# Supplementary material
Source: PubMed Central journal article supplement (PMC2924914)
Supplement: NIHMS193665-supplement-SF1-2.pdf [file NIHMS193665-supplement-SF1-2.pdf]

**Supplementary Table I**

| Gene Target                        | dsRNA Size                                                                                  | Oligonucleotide Sequences (5'-3')                                                          |
|------------------------------------|---------------------------------------------------------------------------------------------|--------------------------------------------------------------------------------------------|
| <b>BiP</b>                         | 95/115 nt*                                                                                  | CCGGCCAAGTGGAGATCATCC/GGATGATCTCCACTTGGCCGG                                                |
|                                    | 246/266 nt*                                                                                 | CCTTATCGGGCGCAAGTTTGA/TCAAACCTTGCGCCCGATAAGG                                               |
|                                    | 823/847 nt**                                                                                | <i>CAGGATCCACCAACACAGGAGATAAGGCAAAGG/</i><br><i>TCGCATGCCCTTTGCCTTATCTCCTGTGTTGGT</i>      |
| 1/760 nt***                        | <i>CAGGATCCAATCATGTCCCCAGAGGAGATTTCCG/</i><br><i>TCGCATGCGAGCTGACGAATCTTCGGTATAC</i>        |                                                                                            |
| <b><math>\alpha</math>-Tubulin</b> | 114/168 nt*                                                                                 | GTTCAACACGTTCTTCTCGGAGACG/CGTCTCCGAGAAGAACGTGTTGAAC                                        |
|                                    | 1283/1307 nt*                                                                               | TCGAGAAGGACTACGAGGAGATCGG/CCGATCTCCTCGTAGTCCTTCTCGA                                        |
|                                    | 1283/1307 nt**                                                                              | <i>CAGGATCCTCGAGAAGGACTACGAGGAGATCGG/</i><br><i>TCGCATGCCCGATCTCCTCGTAGTCCTTCTCGA</i>      |
| 1/1000 nt***                       | <i>CACGGGATCCAGCACGACGGCCAGATGCCGTCC/</i><br><i>GTATGCATGCGTAGGCGTCGTCCTCCTCCATGTC</i>      |                                                                                            |
| <b><math>\mu</math>1</b>           | 177/201 nt*                                                                                 | CAAGCATAACAGACTGTTATTTGGTG/CACCAAATAACAGTCTGTATGCTTG                                       |
|                                    | 1305/1329 nt*                                                                               | GTCAGTACTGACTGGAATGGTTGTCATA/TATGACAACCATTCCAGTCAGTGAC                                     |
|                                    | 1305/1329 nt**                                                                              | <i>CAGGATCCCAAGCATAACAGACTGTTATTTGGTG/</i><br><i>GTATGCATGCCACCAAATAACAGTCTGTATGCTTGTC</i> |
| 1/1000 nt***                       | <i>CACGGATCCATGATAAGCTCTCTGCTAATCATTAC/</i><br><i>CCAGCATGCCTTGACAACCTTGCTCATGAGGGCAATA</i> |                                                                                            |
| <b><math>\mu</math>2</b>           | 26/48 nt*                                                                                   | ATGATGTAGGTGAGCTTATCTTG/CAAGATAAGCTCACCTACATCAT                                            |
|                                    | 519/539 nt*                                                                                 | CGTCGTTGAGTCTGTCAATGC/ GCATTGACAGACTCAACGACG                                               |
|                                    | 519/539 nt**                                                                                | <i>GTTGGATCCATGATGTAGGTGAGCTTATCTTG/</i><br><i>GGTGCATGCCAAGATAAGTCCACCTACATCAT</i>        |
| 1/1000 nt***                       | <i>GTTGGATCCATGATCAAGGCGGTCACTTCTTTGGAT/</i><br><i>GGTGCATGCCACCTAATCTGATAAAGTCCCCGCGCT</i> |                                                                                            |
| <b>RdRP</b>                        | 74/96 nt*                                                                                   | GTGCCTTAGTCTTCAAAGTTATC/GATAACTTTGAAGACTAAGGCAC                                            |
|                                    | 1334/1354 nt*                                                                               | GCGTTCGGATGATGTCTTTC/GAAAGACATCATCCGGAACGC                                                 |
|                                    | 85/107 nt**                                                                                 | <i>CACGGATCCTTCAAAGTTATCATAGTCATAAT/</i><br><i>CCAGCATGCATTATGACTATGATAACTTTGAA</i>        |
| 1/3420 nt***                       | <i>CACGGATCCATGTCTGGCCCCACATCCACTCGCT /</i><br><i>CCAGCATGCGGCTACAGATTTAGAGTGGTAAATTAT</i>  |                                                                                            |
| <b>eGFP</b>                        | 101/125 nt*                                                                                 | AGAAGCGCGATCACATGGTCC/GGACCATGTGATCGCGCTTCT                                                |
|                                    | 264/288 nt*                                                                                 | CCGGGGTGGTGCCCATCTCG/CAGGATGGGCACCACCCCGG                                                  |
|                                    | 641/665 nt**                                                                                | <i>CACGGATCCAGAAGCGCGATCACATGGTCCTGCT/</i><br><i>CCTGCATGCAGCAGGACCATGTGATCGCGCTTCT</i>    |
| 1/1000 nt***                       | <i>CACGGATCCGTGAGCAAGGGCGAGGAGCTGTTCA/</i><br><i>CCTGCATGCGTGGTTGTCGGGCAGCAGCACGGGG</i>     |                                                                                            |
| <b>CWP2</b>                        | 101/125 nt*                                                                                 | GTGCTAATTGGAAGTCGAATAACTG/CAGTTATTCGACTTCCAATTAGCACC                                       |
|                                    | 264/288 nt*                                                                                 | GTCGCTGTACCTTAATAATAATGAC/GTCATTATTATTAAGGTACAGCGAC                                        |
|                                    | 824/848 nt**                                                                                | <i>CACGGATCCAGAGGAAATGCAACATGCCAAACAG/</i><br><i>CCTGCATGCCTGTTTGGCATGTTGCATTTCTCT</i>     |
| 1/1000 nt***                       | <i>GACAGGATCCAATTGGAAGTCGAATAACTGGCTT/</i><br><i>GTAGCATGCTTTCCTCTGCGCATTGTGTGCACTG</i>     |                                                                                            |

\*oligonucleotide sequence were designed by using siDirect sequences (<http://genomics.jp/sidirect/>) and the sRNA duplex produced exogenously by HiScribe RNAi Transcription Kit. \*\*oligonucleotide sequence to produce endogenous siRNA: 10  $\mu$ l of both strands were combined and incubated at 95°C in a 200-ml water bath. After 5 min, the water bath was allowed to gradually cool to room temperature over a period of 1 h. \*\*\*oligonucleotide sequence to produce endogenous dsRNA: oligonucleotides were used to amplify the 5' sequences of specific genes from genomic *Giardia* DNA using the High Fidelity Taq polymerase (Invitrogen). Restriction sites are denoted in italics. All oligonucleotides were designed to target the 5' sequence of the selected genes.

Supplementary figure 2

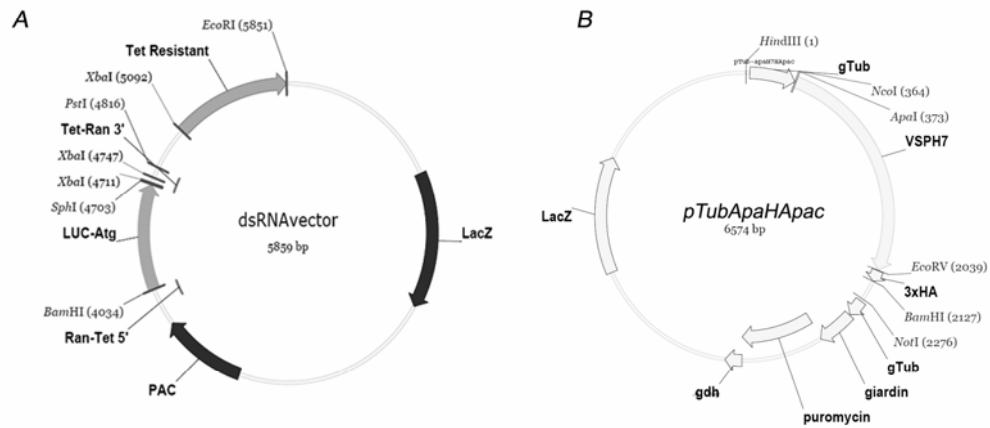

**Figure S2: *Giardia* vectors.** (A) dsRNA Tet-inducible vector. This vector was developed for inducible expression of double-stranded RNAs in *Giardia*. It contains opposing *Giardia* ran promoters with tetracycline (Tet) operator elements and is designed for insertion and double-stranded expression of PCR products. It also has a puromycin cassette under the control of an endogenous non-regulated *gdh* promoter. Gene targeted sequences were amplified by PCR from genomic *Giardia* DNA and introduced between opposing tetracycline-inducible *Giardia* ran promoters. To cotransfect trophozoites and to be able to select each vector, the puromycin acetyl transferase was exchanged for the neomycin acetyl transferase gene present in *pdsRNA* by using the QuikChange mutagenesis kit (Stratagene) (Touz *et al.*, 2004). (B) The vector pTubApaHApac was engineered and constructed for constitutive over-expression of transgenes under the control of endogenous alpha-tubulin promoters. It has a puromycin cassette under the control of an endogenous non-regulated *gdh* promoter (Touz *et al.*, 2003).
